# Supplementary material
Source: Springer Nature journal article supplement (https://www.springermedizin.de/resource/supplementary/12885_2009_1836_MOESM5_ESM.pdf/9460674)

**A**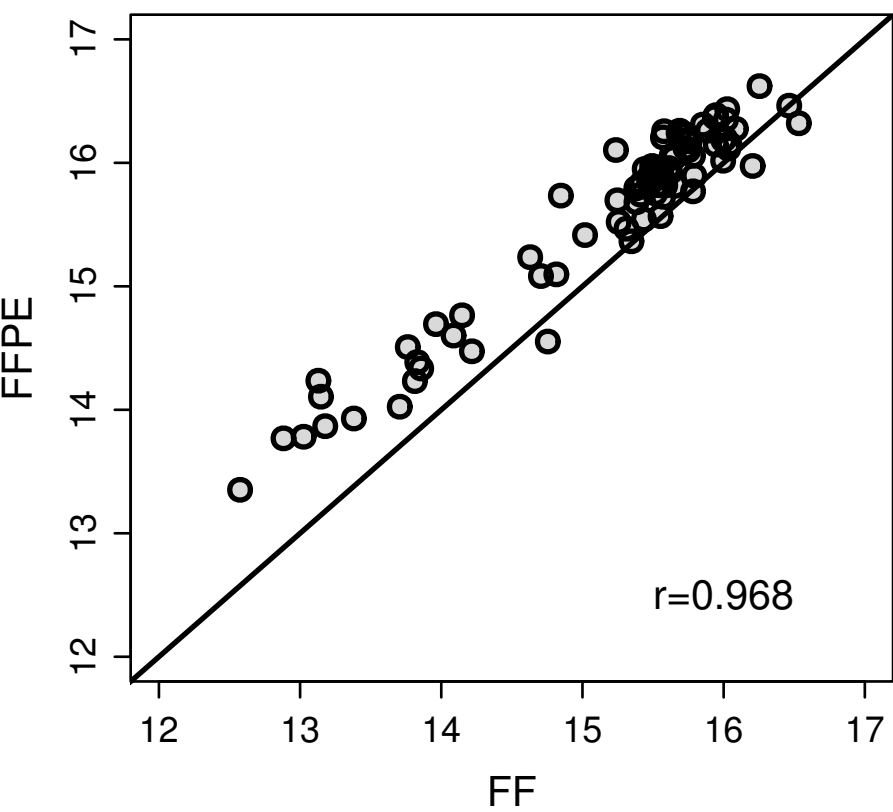**B**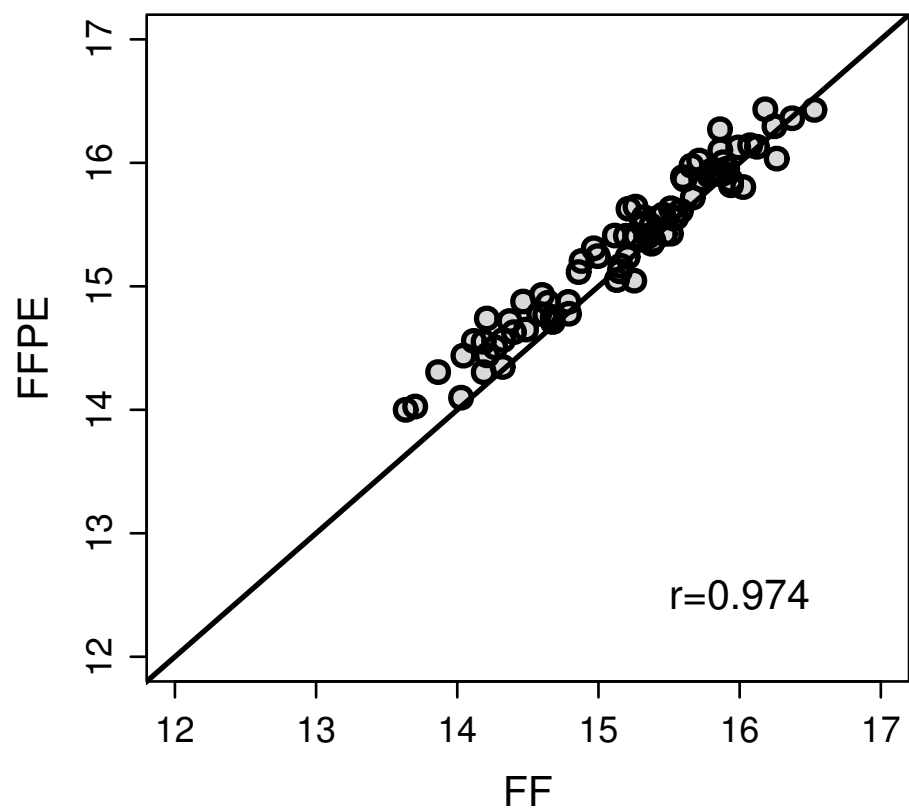**C**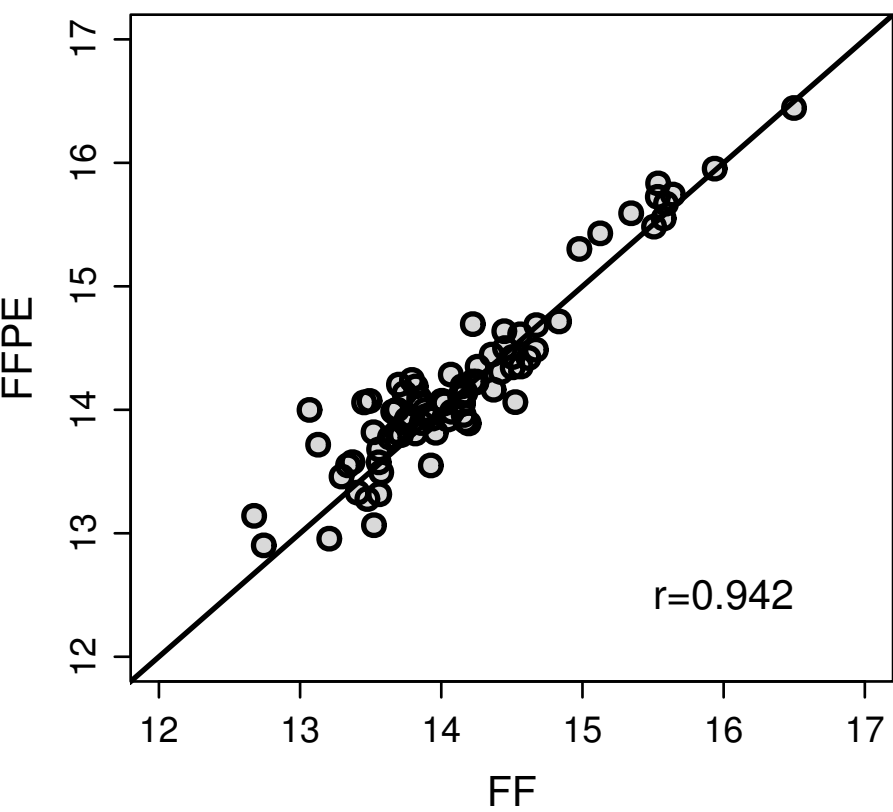**D**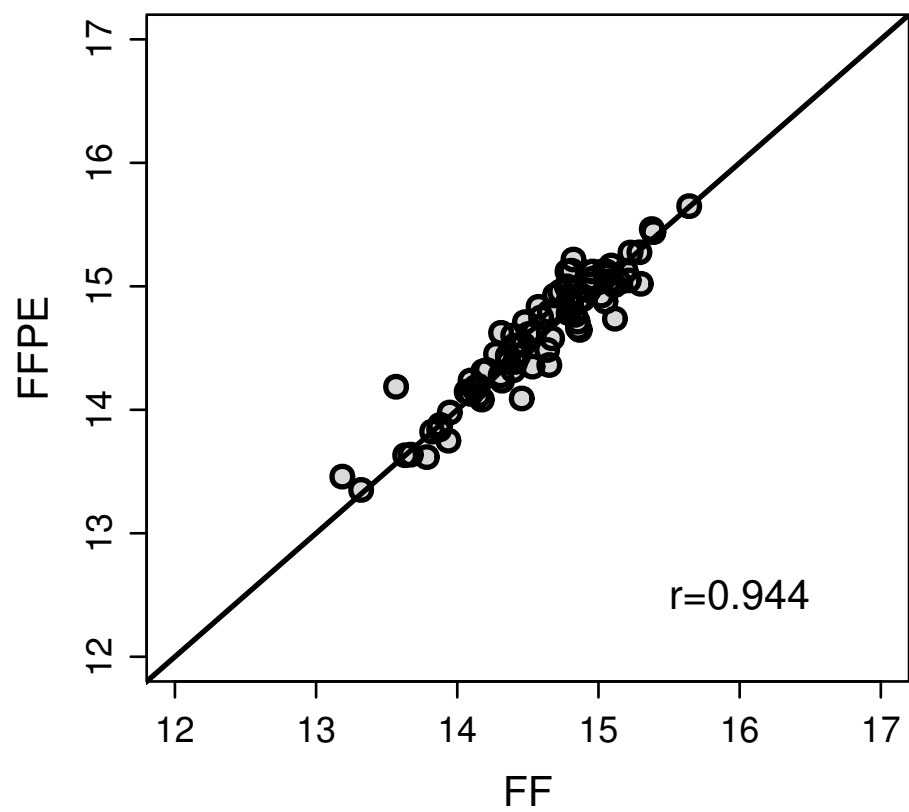

Supplement: MOESM5 [file 9460674]
